1 **Capsular polysaccharides cross-regulation modulates *Bacteroides***  
2 ***thetaiotaomicron* biofilm formation.**

3

4 Nathalie BECHON<sup>1,2\*</sup>; Jovana MIHAJLOVIC<sup>1,2,3\*</sup>; Sol VENDRELL-FERNÁNDEZ<sup>1</sup>;  
5 Florian CHAIN<sup>4</sup>; Philippe LANGELLA<sup>4</sup>; Christophe BELOIN<sup>1</sup>; and Jean-Marc GHIGO<sup>1#</sup>

6

7 \* These authors contributed equally this work

8

9 <sup>1</sup>Institut Pasteur, Genetics of Biofilms Laboratory. 25-28 rue du Docteur Roux, 75015  
10 Paris, cedex 15, France.

11

12 <sup>2</sup>Université de Paris, Ecole Doctorale Bio Sorbonne Paris Cite (BioSPC), Cellule Pasteur, rue  
13 du Dr. Roux 75724, Paris cedex, France.

14

15 <sup>3</sup>Present address: Center for Microbiology and Environmental Systems Science, Department  
16 of Microbiology and Ecosystem Science, Division of Microbial Ecology, University of  
17 Vienna, Althanstrasse 14, Vienna, Austria.

18

19 <sup>4</sup>Commensals and Probiotics-Host Interactions Laboratory, Université Paris-Saclay, INRAE,  
20 AgroParisTech, Micalis Institute, 78350, Jouy-en-Josas, France.

21

22

23 **#Corresponding author:**

24 Jean-Marc Ghigo ([jmghigo@pasteur.fr](mailto:jmghigo@pasteur.fr))

25

26 **Running Title:** Capsules modulate *Bacteroides thetaiotaomicron* biofilm

27

28 **Keywords:** Capsule; *Bacteroides thetaiotaomicron*; biofilm

29

30

31

32 **ABSTRACT**

33

34 *Bacteroides thetaiotaomicron* is one of the most abundant gut symbiont species, whose  
35 contribution to host health through its ability to degrade diet polysaccharides and mature the  
36 immune system is under intense scrutiny. By contrast, adhesion and biofilm formation, which  
37 are potentially involved in gut colonization, microbiota structure and stability, have hardly been  
38 investigated in this intestinal bacterium. To uncover *B. thetaiotaomicron* biofilm-related  
39 functions, we performed a transposon mutagenesis in the poor biofilm-forming reference strain  
40 VPI 5482 and showed that capsule 4, one of the eight *B. thetaiotaomicron* capsules, hinders  
41 biofilm formation. We then showed that the production of capsules 1, 2, 3, 5 and 6 also inhibits  
42 biofilm formation and that decreased capsulation of the population correlated with increased  
43 biofilm formation, suggesting that capsules could be masking adhesive surface structures. We  
44 also showed that, by contrast, capsule 8 displayed intrinsic adhesive properties. Finally, we  
45 demonstrated that *BT2934*, the *wzx* homolog of *B. thetaiotaomicron* glycosylation locus,  
46 competes with capsule production and therefore impacts its adhesion capacity. This study  
47 identified regulation of capsular polysaccharides as a major determinant of *B. thetaiotaomicron*  
48 biofilm formation, providing new insights into how modulation of different *B. thetaiotaomicron*  
49 surface structures affect *in vitro* biofilm formation.

50

51

## 52 INTRODUCTION

53  
54 *Bacteroides thetaiotaomicron* is an abundant bacterial symbiont of the normal mammalian  
55 intestine that contributes to shaping the nutrient environment of the gut microbiome through  
56 degradation of complex polysaccharides and production of short chain fatty acids (1-5). *B.*  
57 *thetaitotaomicron* was also shown to stimulate the development of gut immunity (6), attenuate  
58 intestinal inflammation (7) and to strengthen the intestinal protective barrier (8, 9).  
59 Consistently, decrease in abundance of *B. thetaiotaomicron* and other *Bacteroides* species has  
60 been correlated with gut inflammation and disease emergence, underlining the importance of  
61 the gut microbiota for host intestinal physiology and health (10). By contrast, microbial  
62 functions involved in the establishment and maintenance of a healthy gut microbiota are still  
63 not well understood. It is speculated that the ability of symbiont bacteria to form biofilms could  
64 contribute to microbiota stability (11, 12). However, although bacterial biofilm formation has  
65 been studied in various facultative symbiotic and pathogenic anaerobes, information on this  
66 widespread lifestyle is still scarce in *B. thetaiotaomicron* (13-15). Whereas a comparative gene  
67 expression profiling between biofilm and planktonically grown *B. thetaiotaomicron* showed  
68 biofilm-associated up-regulation of polysaccharide utilization systems and capsule 8, one of the  
69 eight *B. thetaiotaomicron* capsule synthesis loci (15, 16) there is still no direct proof of the  
70 contribution of these surface structures to adhesion and biofilm formation. We recently showed  
71 that, although biofilm capacity is widespread among *B. thetaiotaomicron* isolates, the widely  
72 used reference strain VPI 5482 is a poor biofilm former. Nevertheless, use of a transposon  
73 mutagenesis followed by a positive selection procedure revealed mutants with significantly  
74 improved biofilm capacity, due to alteration of the structure of a putative type V pilus (13). In  
75 this study, we showed that regulation of capsule expression is another major determinant of  
76 biofilm formation by masking or unmasking adhesive *B. thetaiotaomicron* structures. This  
77 study provides new insights into the roles of capsular polysaccharides in *B. thetaiotaomicron*  
78 and their impact on the physiology and biofilm formation of a prominent gut symbiont.

79  
80  
81  
82  
83

## 84 RESULTS

85

### 86 Transposon insertion in capsule 4 biosynthesis operon promotes *B. thetaiotaomicron* 87 biofilm formation.

88 Among the previously identified transposon mutants displaying increased *in vitro* biofilm  
89 formation capacity compared to the wildtype *B. thetaiotaomicron* VPI5482 (WT) (13), 5 of  
90 them corresponded to insertions within capsule 4 (*CPS4*) synthesis operon *BT1358-1338*,  
91 encoding one of the eight capsular polysaccharides of *B. thetaiotaomicron* (Figure 1AB and  
92 table S1) (16, 17). To confirm the increased biofilm phenotype of the transposon mutants, we  
93 deleted all 19 *CPS4* structural genes located downstream of the regulators *BT1358-1357*.  
94 Crystal violet staining of *in vitro* biofilm formed in 96-well microtiter plates showed that the  
95 resulting  $\Delta BT1356-1338$  mutant (hereafter named  $\Delta CPS4$ ) displayed a significant increase in  
96 biofilm formation compared to the wild type *B. thetaiotaomicron* VPI 5482 (Figure 1C).

97

### 98 *B. thetaiotaomicron* biofilm formation is modulated by capsule cross-regulation

99 To uncover the mechanism of increased biofilm formation in a  $\Delta CPS4$  strain, we performed a  
100 random transposon mutagenesis in  $\Delta CPS4$  and identified 6 mutants out of 4650 with reduced  
101 biofilm formation capacity compared to the parental  $\Delta CPS4$  (Figure 2A). Five of these mutants  
102 corresponded to transposons inserted in the *BT1358-1357* region just upstream of the *CPS4*  
103 operon (Figure 1A and Figure 2B, Supplementary Table S1). *BT1358* codes for an UpxY-like  
104 homolog and *BT1357* codes for a UpxZ-like homolog, two regulatory genes located at the  
105 beginning of most capsule synthesis operons in *B. thetaiotaomicron* and *B. fragilis* (18, 19).  
106 UpxY-like proteins positively regulate their cognate capsular operon by preventing premature  
107 transcription termination in the untranslated region, thus facilitating the otherwise abortive  
108 transcription of the downstream capsular genes (18). By contrast, UpxZ-like proteins are  
109 repressors of transcription of non-adjacent capsular systems (19). We first showed that deletion  
110 of *upxY<sup>BT1358</sup>* in *B. thetaiotaomicron*  $\Delta CPS4$  did not impact biofilm formation, which is  
111 consistent with its role as a positive regulator of the expression of capsule 4 genes, all missing  
112 in the  $\Delta CPS4$  mutant (Figure 2BC). We then hypothesized that transposon insertion in  
113 *upxY<sup>BT1358</sup>* (located upstream of *upxZ<sup>BT1357</sup>*) could have a polar effect on the expression of the  
114 repressor *upxZ<sup>BT1357</sup>*, leading to the de-repression one or more of the 7 other *B. thetaiotaomicron*  
115 capsular polysaccharides. Indeed, in-frame deletion of *upxZ<sup>BT1357</sup>* or *upxY<sup>BT1358</sup>-upxZ<sup>BT1357</sup>* in a  
116  $\Delta CPS4$  background did not affect growth but led to loss of biofilm capacity (Figure 2C and

117 Supplementary figure S1A). This phenotype could be complemented *in trans* by introducing  
118 *upxZ<sup>BT1357</sup>* expressed from a constitutive promoter in the 5' untranslated region of the tRNA-Ser  
119 chromosomal locus, either in  $\Delta upxZ^{BT1357} \Delta CPS4$  or  $\Delta upxY^{BT1358} - upxZ^{BT1357} \Delta CPS4$  *B.*  
120 *thetaitoaomicron* background (Figure 2C). To identify which capsules were repressed by  
121 *upxZ<sup>BT1357</sup>*, we used qRT-PCR to monitor the expression of each capsular operon and we  
122 observed an increased transcription of capsule 2 (CPS2) in *B. thetaiotaomicron*  
123  $\Delta upxZ^{BT1357} \Delta CPS4$  compared to *B. thetaiotaomicron*  $\Delta CPS4$  single mutant (Supplementary  
124 Figure S2). Consistently, deletion of CPS2 operon in *B. thetaiotaomicron*  $\Delta upxZ^{BT1357} \Delta CPS4$   
125 background restored biofilm formation capacity (Figure 2D) Thus, expression of either CPS4,  
126 or CPS2 in absence of CPS4, hinders biofilm formation.

127

### 128 **Expression of capsule 8 and lack of any capsules both induce biofilm formation.**

129 To assess the contribution of all capsules, besides inhibition by CPS4 or CPS2, to *B.*  
130 *thetaitoaomicron* biofilm formation, we used a recently described set of strains only expressing  
131 one of the eight *B. thetaiotaomicron* capsular types (20). We observed that derivative strains  
132 expressing only capsule 1, 2, 3, 4, 5 or 6 formed as little biofilm as wildtype (WT) *B.*  
133 *thetaitoaomicron* VPI5482. Interestingly strains only expressing CPS7 or CPS8 formed over  
134 35 times more biofilm than the WT strain (Figure 3A). However, all CPS7-only bacteria seemed  
135 to be acapsulated, which is consistent with previous observations suggesting that capsule 7 may  
136 not be expressed in tested laboratory conditions (Supplementary Figure S3AB) (20). Indeed,  
137 similarly to a CPS7-only strain, a strain deleted for all 8 capsule operons ( $\Delta CPS1-8$ ) formed 40  
138 times more biofilm than WT (Figure 3A) and showed strong aggregation phenotype in  
139 overnight cultures (Supplementary figure S3B). By contrast, India ink staining confirmed the  
140 presence of a capsule in biofilm-forming (but not aggregating) CPS8-only bacteria, suggesting  
141 that capsule 8 could have intrinsic adhesive properties (Supplementary Figure S3AB). These  
142 results showed that acapsulated cells have a strong adhesion capacity and that, except for CPS8  
143 and potentially CPS7, the expression of all capsules hinders *B. thetaiotaomicron* biofilm  
144 formation.

145

### 146 **Deletion of capsule 4 leads to a heterogeneously capsulated bacterial population**

147 To determine whether lack of capsule or expression of the biofilm-promoting capsule 8 was  
148 responsible for the observed increased biofilm formation in  $\Delta CPS4$  strain, we used  
149 Transmission Electron Microscopy (TEM) and showed that whereas WT *B. thetaiotaomicron*

150 bacteria were almost all capsulated (>98%), ca. 30% of  $\Delta CPS4$  cells lacked a visible capsule  
151 (Figure 3BC). Considering that  $\Delta CPS1-8$  formed 4 times more biofilm than  $\Delta CPS4$ , this  
152 suggested a correlation between increased frequency of non-capsulated cells in the population  
153 and the increased ability to form biofilms (Figure 3A and C). To determine whether capsulated  
154 cells in  $\Delta CPS4$  population contributed to adhesion, we deleted, in the  $\Delta CPS4$  background,  
155 either *CPS8*, the only biofilm-promoting capsule of *B. thetaiotaomicron*, or *CPS7*, for which  
156 we could not ascertain the biofilm formation potential using single CPS expressing strain. Both  
157  $\Delta CPS4\Delta CPS7$  and  $\Delta CPS4\Delta CPS8$  mutants had similar biofilm capacity compared to a  $\Delta CPS4$   
158 mutant, showing that neither capsule 7 nor 8 contribute to biofilm formation in absence of  
159 capsule 4 (Figure 3D). Moreover, TEM imaging showed that the non-biofilm forming  
160  $\Delta upxZ^{BT1357}\Delta CPS4$  double mutant was entirely capsulated (due to induction of *CPS2*,  
161 Supplementary figure S2), supporting a correlation between increased biofilm formation  
162 (Figure 3A) and presence of a subpopulation of acapsulated cells in the  $\Delta CPS4$  strain (Figure  
163 3B and C). Consistently, deletion of *CPS2* in the  $\Delta upxZ^{BT1357}\Delta CPS4$  background led to the  
164 apparition of 37% of acapsulated bacteria in a  $\Delta upxZ^{BT1357}\Delta CPS4\Delta CPS2$  population (Figure 3B  
165 and C) and restored biofilm formation (Figure 2D).

166

### 167 **Identification of BT2934 as a new *B. thetaiotaomicron* inhibitor of capsule expression**

168 In addition to mutation in  $\Delta upxZ^{BT1357}$  capsule repressor, we also identified an additional  
169 biofilm-deficient  $\Delta CPS4$  transposon mutant (34H5) with an insertion in *BT2934* (Figure 3A  
170 and 4A). *BT2934-2947* region corresponds to a *B. thetaiotaomicron* protein glycosylation locus  
171 (21, 22), in which *BT2934* encodes a homolog of the transmembrane oligosaccharide flippase  
172 Wzx (Figure 4A). We deleted *BT2934* and the 4 putative glycosyl transferases genes *BT2935-  
173 2938* located in the same operon and confirmed the role of *BT2934-2938* in protein  
174 glycosylation, as several bands disappeared from a protein glycosylation profile in  
175  $\Delta CPS4\Delta BT2934-2938$  and 34H5 mutants compared to  $\Delta CPS4$  (Supplementary figure S4). The  
176 double mutant  $\Delta CPS4 \Delta BT2934-2938$  had no growth defect and displayed a 2-fold decrease in  
177 biofilm formation compared to  $\Delta CPS4$  (Figure 4B and Supplementary figure S1B). However,  
178 it still formed more biofilm than the original 34H5 transposon mutant in *BT2934*. To determine  
179 the origin of this discrepancy, we only deleted *BT2935-2938* glycosyl transferases genes and  
180 did not observe reduced biofilm capacity compared to the  $\Delta CPS4$  strain. Although we did not  
181 succeed in deleting *BT2934* alone, introduction of p*BT2934*, constitutively expressing *BT2934*,  
182 in 34H5 transposon mutant and  $\Delta CPS4\Delta BT2934-38$  restored biofilm formation, but still  
183 showed an altered protein glycosylation profile (Figure 4C and supplementary figure S4). These

184 results suggested that *BT2934* impact on biofilm formation did not involve *BT2935-2938* and  
185 might not directly involve protein glycosylation. Finally, we showed that while  $\Delta$ *CPS4* and  
186  $\Delta$ *CPS4* $\Delta$ *BT2935-2938* bacteria displayed similar level of acapsulated cells (30% and 28%  
187 respectively),  $\Delta$ *CPS4* $\Delta$ *BT2934-2938* cells showed full, wildtype level of capsulation (Figure  
188 4DE), reduced back down to over 50% of capsulated cells upon complementation by *pBT2934*  
189 (Figure 4DE). To identify whether *BT2934* directly inhibited capsule production, we  
190 overexpressed *BT2934* in each single CPS expressing strains. We hypothesized that  
191 overexpression of *BT2934* in each of these strains could inhibit capsule expression and lead to  
192 acapsulation of the whole population, thus leading to aggregation in overnight cultures.  
193 However, none of the resulting strains aggregated, hinting that no capsules were directly  
194 inhibited by an overexpression of *BT2934*. Taken together, these results suggest that *BT2934*  
195 indirectly impacts capsule production in *B. thetaiotaomicron*, with consequences on its ability  
196 to form biofilm.

197

### 198 **Biofilm-forming *CPS4* and *BT2934* mutants are outcompeted by the wildtype strain *in*** 199 ***vivo***

200 *CPS4* and *BT2934* have previously been shown to be important for *in vivo* colonization in  
201 presence of a complex mix of *B. thetaiotaomicron* transposon mutants (23). To test whether  
202 unmasking *B. thetaiotaomicron* biofilm formation capacity could contribute to *in vivo*  
203 colonization, we used intragastric gavage to inoculate axenic mice with erythromycin-resistant  
204 WT-*erm* and tetracycline-resistant  $\Delta$ *CPS4-tet* or  $\Delta$ *BT2934-38-tet* in a 1:1 mix ratio and  
205 measured abundance of each strain in feces for 8 days using erythromycin and tetracycline  
206 resistance to discriminate between the strains. We first verified that *erm* and *tet* resistance  
207 markers did not impact *in vivo* colonization of WT-*erm* and WT-*tet* (Figure 5A). We then  
208 showed that both  $\Delta$ *CPS4* and  $\Delta$ *BT2934-38* were outcompeted by WT strain in two-strains co-  
209 colonization experiments (Figure 5BC), even though both  $\Delta$ *CPS4* and  $\Delta$ *BT2934-38* formed  
210 more biofilm than WT (Figure 1C and supplementary figure S6). When we tested colonization  
211 of the double mutant  $\Delta$ *CPS4* $\Delta$ *BT2934-2938* against  $\Delta$ *CPS4*, we found that they colonized mice  
212 similarly (Figure 5D), indicating that *BT2934* is only necessary for colonization in WT but not  
213 in  $\Delta$ *CPS4* background. Taken together, these results showed that increased *in vitro* biofilm  
214 formation capacity is not predictive of *in vivo* colonization capacity.

215

216

217

## 218 DISCUSSION

219

220 In contrast to oral *Bacteroidales*, intestinal *Bacteroidales* species possess numerous capsular  
221 polysaccharide loci that play important beneficial roles during gut colonization, ranging from  
222 protecting bacteria from stresses to mediating interactions with the host immune system (17,  
223 20, 24-26). In this study we showed that deletion of one of *B. thetaiotaomicron* 8 capsular  
224 polysaccharides, CPS4, promotes biofilm formation *in vitro*, indicating that capsules mediate  
225 yet another important aspect of bacterial physiology.

226

227 Bacterial capsular polysaccharides are known to negatively affect biofilm formation by  
228 masking surface structures involved in adhesion in many bacteria (27-31). It was shown, for  
229 instance, that *Escherichia coli* capsular polysaccharides inhibit adhesion and autoaggregation  
230 by masking the short autotransporter adhesin antigen 43 as well as type III secretion system  
231 required for attachment in enteropathogenic *E. coli* (EPEC) (32, 33). The fact that CPS4 is the  
232 most expressed capsule in the tested laboratory conditions and *in vivo* (20) probably explains  
233 why it was the only capsule of *B. thetaiotaomicron* we identified by random transposon  
234 mutagenesis screening for increased biofilm formation.

235

236 In an adhering  $\Delta$ CPS4 strain, 30% of the bacteria are acapsulated, indicating that occurrence of  
237 only a subpopulation of acapsulated cells is enough to induce biofilm formation. In *Bacteroides*  
238 *fragilis*, acapsular cells were previously shown to aggregate (17, 34) and we also observed that  
239 a completely acapsular strain of *B. thetaiotaomicron* lacking all 8 capsules ( $\Delta$ CPS1-8) displays  
240 a strong aggregation phenotype, suggesting cell-to-cell interactions driving biofilm formation  
241 in the absence of a capsule. However, due to the protective roles of *Bacteroides* capsules,  
242 acapsular strains are rapidly outcompeted by WT strain in axenic mice colonization (17, 34,  
243 35). It is therefore unclear whether acapsular cells can be found *in vivo*, as studies following  
244 the expression of the 8 capsules of *B. thetaiotaomicron* by qRT-PCR would miss it, since there  
245 is no marker of acapsular cells. However, colonization of axenic mice with a mix composed of  
246 an acapsular mutant and 8 strains each expressing a single capsule showed that a low amount  
247 of acapsular cells was found to persist in the lumen of the small intestine of two out of five  
248 mice, potentially due to a decreased immune system pressure allowing the acapsular cells to  
249 survive (20).

250

251



252 *Bacteroides sp.* capsular loci are regulated by a complex transcriptional network, involving  
253 stochastic inversion of some capsule promoters (17, 36), transcriptional cross-regulation  
254 between capsular regulators UpxY and UpxZ (18, 19) and cross-talk between polysaccharide  
255 utilization loci and capsules through common sigma factors (37). It is also impacted by a range  
256 of environmental parameters such as diet, community composition and host physiology (20,  
257 37, 38). In particular, expression of capsule 4 in mice has been shown to be increased *in vivo*  
258 compared to *in vitro* in a high fiber diet, but it is decreased in the suckling period compared to  
259 the weaned period (37, 38), and it is strongly impacted by the immune system (20). Moreover,  
260 a transcriptional analysis comparing planktonic cells with biofilms grown on chemostats for 8  
261 days previously showed that CPS4 is downregulated in *B. thetaiotaomicron* biofilms (15).

262  
263 Random transposon mutagenesis in  $\Delta$ CPS4 strain identified capsule regulation as the main  
264 parameter governing biofilm formation in our conditions. We show that *BT1357*, encoding the  
265 UpxZ homolog of *CPS4*, represses transcription of CPS2. As UpxZ proteins repress the  
266 transcription of non-adjacent capsular operon by interacting with the antiterminator UpxY  
267 proteins, necessary for the full transcription of their cognate capsules (18, 19), *BT1357* therefore  
268 most likely only interferes with *BT0462*, the UpxY homolog of *CPS2*. Whereas the complex  
269 interplay between UpxY and UpxZ homologs of *B. fragilis* was very well described, it is, to  
270 our knowledge, the first description of the precise inhibition pattern of a *B. thetaiotaomicron*  
271 UpxZ homolog (18, 19).

272  
273 In addition to *BT1357*, we have identified that deletion of *BT2934* impacted capsule production.  
274 *BT2934-2947* is the protein O-glycosylation locus of *B. thetaiotaomicron* (21, 22). This locus  
275 is composed of a *wzx* oligosaccharide flippase (*BT2934*) and glycosyl transferases and its  
276 homolog in *B. fragilis*, *BF4298-4306* locus, was shown to be required for both *in vivo* and *in*  
277 *vitro* fitness in *B. fragilis* (21, 22). Accordingly, *BT2934* was previously shown to be important  
278 in both *in vitro* and *in vivo* competition experiments between complex communities of *B.*  
279 *thetaiotaomicron* transposon mutants (23) and was recently described as a putative essential  
280 gene (39). Our results confirm both the role of the  $\Delta$ *BT2934-2938* locus in protein glycosylation  
281 and the decreased colonization capacity of a  $\Delta$ *BT2934-2938* mutant in axenic mice in  
282 competition with the WT strain. However, deletion of *BT2934-2938* in  $\Delta$ CPS4 background had  
283 no effect on the colonization capacity of this strain. Although we never succeeded to delete  
284 *BT2934* alone, deletion of *BT2934-2938* in WT and  $\Delta$ CPS4 background did not lead to any

285 growth defect *in vitro*, suggesting that deleting *BT2935-2938* might somehow alleviate the  
286 fitness cost associated with loss of *BT2934*.

287  
288 We showed that deletion of *BT2934* impacted capsule production independently of protein  
289 glycosylation, as complementation by *BT2934* is sufficient to restore  $\Delta$ CPS4 biofilm formation  
290 phenotype, but not the lack of protein glycosylation. The mechanism by which *BT2934* impacts  
291 capsule production remains to be elucidated. Because overexpression of *BT2934* in each single  
292 CPS expressing strains did not lead to general acapsulation, we hypothesize that *BT2934* does  
293 not directly inhibit capsule production. *BT2934* catalyzes the flipping of an oligosaccharide  
294 bound to an undecaprenyl-phosphate molecule across the membrane. As oligosaccharide  
295 flipping is also required for lipopolysaccharide and capsular synthesis, we speculate that these  
296 three processes might compete for undecaprenyl-phosphate or sugar moieties availability. Thus,  
297 limiting protein glycosylation by removing *BT2934* could favor the production of some  
298 capsules.

299 While our random transposition mutagenesis in  $\Delta$ CPS4 was not saturating, it is surprising that  
300 all identified biofilm-deficient mutants corresponded to insertions affecting capsule production  
301 rather than a putative adhesion factors unmasked in acapsulated bacteria. This could be  
302 indicative of the role played by purely electrostatic interactions between acapsulated bacteria  
303 or mediated by multiple and potentially redundant adhesive surface structures

304 We show that expression of all capsular polysaccharide of *B. thetaiotaomicron* hindered biofilm  
305 formation, except for CPS8 that rather promoted biofilm formation. Consistently, CPS8  
306 expression was shown to be up-regulated in 8-day chemostat-grown biofilms (15), while  
307 capsules 1, 3, 4 and 6 were down-regulated. CPS8 might either be an adhesive capsule or a  
308 loose capsule that does not mask adhesion factors. However, if CPS8 did not mask adhesion  
309 factors we would expect CPS8-only strain to adhere like  $\Delta$ CPS1-8, but CPS8-only formed less  
310 biofilm than  $\Delta$ CPS1-8 and it did not aggregate overnight. This suggests that capsule 8 could be  
311 a capsule providing adhesion capacity on its own. Interestingly, CPS8 is the only capsular locus  
312 of *B. thetaiotaomicron* containing homologs of FimA, the major component of type V pilus  
313 (40). Type V pili are widely found in *Bacteroidetes* and they were shown to mediate adhesion  
314 in *Porphyromonas gingivalis* (41, 42). Moreover, we previously showed that another homolog  
315 of FimA, BT3147, mediated biofilm formation in *B. thetaiotaomicron* upon truncation of the  
316 last 9 amino acids (13). CPS8 is expressed to low levels in axenic mice mono-colonized with  
317 *B. thetaiotaomicron*, and to slightly higher levels in mice colonized with complex communities,  
318 suggesting it might confer an advantage to *B. thetaiotaomicron* when competing with other

319 bacteria for colonization. Whereas a strain expressing only CPS8 is rapidly outcompeted by the  
320 WT in *in vivo* competition experiment, some population of CPS8-only bacteria can be found in  
321 the lumen of the small intestine in some mice, reminiscent of the acapsular strain localization  
322 (20).

323  
324 In this study, we found no evidence that higher *in vitro* adhesion would lead to better  
325 colonization of axenic mice. However, we assessed abundance of each strain by enumerating  
326 bacteria in the feces of mice, even though feces composition only partially recapitulates gut  
327 microbiota composition (43). In particular, we can imagine that cells with higher adhesion  
328 would not be shed in the feces as much as cells with low adhesion, mimicking a colonization  
329 defect. Moreover, besides biofilm formation, *CPS4* and *BT2934* participate in other significant  
330 processes *i.e.* interactions with the immune system and protein glycosylation respectively.  
331 Therefore, we cannot establish that the loss of *in vivo* fitness of  $\Delta$ *CPS4* and  $\Delta$ *BT2934-38*  
332 compared to WT is due to biofilm formation defect or to the loss of other functions impacted  
333 by the deletion of these genes.

334  
335 In this study, we have shown that capsule regulation is a major determinant of biofilm formation  
336 and that competition between protein glycosylation and capsule production could constitute  
337 another layer of an already very complex capsule regulatory system. Further investigation of  
338 the mechanisms of biofilm formation in the gut commensal *B. thetaiotaomicron* will allow us  
339 to address the physiological adaptations of these bacteria within an anaerobic biofilm.

340  
341

## 342 MATERIALS AND METHODS

343

### 344 Bacterial strains and growth conditions.

345 Bacterial strains used in this study are listed in Table S2. *B. thetaiotaomicron* was grown in  
346 BHIS broth (44) supplemented with erythromycin 15  $\mu\text{g/ml}$  (erm), tetracycline 2.5  $\mu\text{g/ml}$  (tet),  
347 gentamycin 200  $\mu\text{g/ml}$  (genta) or 5'-fluoro-2'-deoxyuridin 200  $\mu\text{g/ml}$  (FdUR) when required  
348 and incubated at 37°C in anaerobic conditions using jars with anaerobic atmosphere generators  
349 (GENbag anaero, Biomerieux, ref. 45534) or in a C400M Ruskinn anaerobic-microaerophilic  
350 station. *Escherichia coli* S17 $\lambda$ pir was grown in Miller's Lysogeny Broth (LB) (Corning)  
351 supplemented with ampicillin (100  $\mu\text{g/ml}$ ) when required and incubated at 37°C with 180 rpm  
352 shaking. Cultures on solid media were done in BHIS with 1.5% agar and antibiotics were added  
353 when needed. Bacteria were always streaked from glycerol stock on BHIS-agar before being  
354 grown in liquid cultures. All media and chemicals were purchased from Sigma-Aldrich unless  
355 indicated otherwise. All experiments and genetic constructions of *B. thetaiotaomicron* were  
356 made in VPI 5482 $\Delta$ tdk strain, which was developed for 2-step selection procedure of unmarked  
357 gene deletion by allelic exchange, as previously described (45). Therefore, the VPI 5482 $\Delta$ tdk  
358 is referred to as wild type in this study.

359

### 360 96-well crystal violet biofilm formation assay.

361 Overnight culture was diluted to  $\text{OD}_{600} = 0.05$  in 100 $\mu\text{L}$  BHIS and inoculated in technical  
362 duplicates in polystyrene Greiner round-bottom 96-well plates. The wells at the border of the  
363 plates were filled with 200 $\mu\text{L}$  water to prevent evaporation. Incubation was done at 37°C in  
364 anaerobic conditions for 48h. The biofilm was fixed using 25 $\mu\text{L}$  of Bouin solution (picric acid  
365 0.9%, formaldehyde 9% and acetic acid 5%, HT10132, Sigma-Aldrich) for 10min. Then the  
366 wells were washed once with water by immersion and flicking, and the biofilm was stained  
367 with 125 $\mu\text{L}$  1% crystal violet (V5265, Sigma-Aldrich) for 10 minutes. Crystal violet solution  
368 was removed by flicking and biofilms were washed twice with water. Stained biofilms were  
369 resuspended in 1:4 acetone: ethanol mix and absorbance at 575nm was measured using TECAN  
370 infinite M200 PRO plate reader.

371

### 372 Targeted mutagenesis.

373 Deletion mutants were constructed using the previously described vector for allelic exchange  
374 in *B. thetaiotaomicron*: pExchange-tdk (45). A list of all the primers used in this study can be  
375 found in Table S3. Briefly, 1kb region upstream and downstream of the target sequence and

376 pExchange-*tdk* were amplified by PCR using Phusion Flash High-Fidelity PCR Master Mix  
377 (Thermofischer Scientific, F548). All three fragments were ligated using Gibson assembly: the  
378 inserts and the plasmids were mixed with Gibson master mix 2x (100µL 5X ISO Buffer, 0.2  
379 µL 10,000 U/mL T5 exonuclease (NEB #M0363S), 6.25 µL 2,000 U/mL Phusion HF  
380 polymerase (NEB #M0530S), 50 µL 40,000 U/mL Taq DNA ligase (NEB #M0208S), 87 µL  
381 dH<sub>2</sub>O for 24 reactions) and incubated at 50 °C for 35 min. The resulting mix was transformed  
382 in *E. coli* S17λpir that was used to deliver the vector to *B. thetaiotaomicron* by conjugation.  
383 Conjugation was carried out by mixing exponentially grown cultures (OD<sub>600</sub>=0.6) of the donor  
384 and the recipient strain in a 2:1 ratio. The mixture was spotted on BHIS-agar plates and  
385 incubated at 37°C in aerobic conditions overnight. The mix was then streaked on BHIS agar  
386 supplemented with antibiotic – for selection of *B. thetaiotaomicron* transconjugants that had  
387 undergone the first recombination event – and gentamicin to ensure exclusion of any *E. coli*  
388 growth. 8 of the resulting colonies were grown overnight in BHIS with no antibiotic to allow a  
389 second recombination event, and the culture was plated on BHIS-agar plates supplemented with  
390 FdUR to select for loss of plasmid. The resulting deletion mutants were confirmed by PCR and  
391 sequencing.

392 We used the pNBU2-bla-erm vector (46) for complementation, which inserts in the 5'  
393 untranslated region of the tRNA-Ser, in which we previously cloned the constitutive promoter  
394 of *BT1311* encoding the sigma factor RpoD (13). We constructed a pNBU2-bla-tet vector by  
395 replacing the erythromycin resistance gene by a tetracycline resistance gene from the  
396 pExchange-tet plasmid using Gibson assembly (see above). Target genes were amplified by  
397 PCR using Phusion Flash High-Fidelity PCR Master Mix from start codon to stop codon and  
398 they were cloned after *BT1311* promoter by Gibson assembly. The Gibson mix was transformed  
399 in *E. coli* S17λpir and the resulting *E. coli* was used to transfer the plasmid to *B.*  
400 *thetaitaomicron* by conjugation (see above).

401

#### 402 **Transposon mutagenesis.**

403 pSAMbt, the previously published tool for random mariner-based transposon mutagenesis in  
404 *B. thetaiotaomicron* (23) was conjugated in *B. thetaiotaomicron* as described above. After  
405 streaking on BHIS-erm-genta agar plates, isolated colonies were resuspended in 100µL BHIS  
406 in 96-well plates, grown overnight and tested for biofilm formation as described above. The  
407 selected clones were then streaked on a fresh BHIS-erm-genta agar plate and 3 isolated colonies  
408 were tested for biofilm formation to ensure no mix of transposon mutants had occurred during  
409 preparation of the library. The genomic DNA of the validated clones was extracted using

410 DNeasy blood and tissue kit (Qiagen) and sent for whole genome sequencing at the Mutualized  
411 platform for Microbiology of Institut Pasteur.

412

### 413 **Electronic microscopy and numbering of acapsulated bacteria.**

414 Overnight cultures were adjusted to 1ml OD<sub>600</sub>=1.5. Cells were treated as described in Jacques  
415 and Foiry (Jacques and Foiry, 1989) for capsule observation: cultures were resuspended in  
416 glutaraldehyde 5% in 0.1M cacodylate buffer pH=7.2 and incubated at room temperature for  
417 2h. Cells were then washed three times in 0.1M cacodylate buffer pH=7.2 and fixed 30min in  
418 1mg/mL ferritin in 0.1M cacodylate buffer pH=7.2. Cells were washed one last time in 0.1M  
419 cacodylate buffer pH=7.2 and sent for transmission electronic microscopy at Electronic  
420 microscopy platform IBiSA of the University of Tours ([https://microscopies.med.univ-  
421 tours.fr/](https://microscopies.med.univ-tours.fr/)). Acapsulated cells were counted by hand using Fiji cell counter plugin.

422

### 423 **India ink stain.**

424 5μL of overnight cultures were mixed with 3μL India ink directly on Superfrost plus glass  
425 microscopy slide (Thermofischer Scientific) and left to dry for 2min. The excess liquid was  
426 removed with paper towel after addition of the coverslip, and the cells were observed with a  
427 photonic microscope, 1000X.

428

### 429 **RNA extraction.**

430 Overnight cultures were mixed with RNA protect Bacteria Reagent (Qiagen) at a 1:2 volume  
431 ratio. The mix was incubated 5min at room temperature, then spun-down 10min 5000xg. The  
432 pellet was kept at -80°C. RNA was extracted from the pellet using FastRNA Pro Blue kit (MP).  
433 The pellet was resuspended in 1mL RNAPro and mixed with lysing Matrix B. Cells were  
434 broken using FastPrep instrument at 40s, speed 6, twice at 4°C. The lysate was centrifugated  
435 for 10min at 4°C, 12000xg and the supernatant was collected and mixed with 300μL of  
436 chloroform. After 5min incubation at room temperature, the mix was centrifugated at 12000xg  
437 4°C for 5min. The upper phase was transferred to a tube containing 500μL cold 100% ethanol  
438 and the nucleic acids were precipitated for 1h at -20°C. The tubes were centrifuged at 12000xg  
439 at 4°C for 15min and the pellet was washed in 500μL cold 75% ethanol. After centrifugation at  
440 12000xg 4°C for 5min the ethanol was removed and the pellet was air-dried. 60μL of RNA-  
441 free water were added to the resuspend the nucleic acid and we treated it with TURBO DNase  
442 from TURBO DNA free kit (Thermofischer Scientific, AM1907) for 1h30. Then the enzyme

443 was inactivated using TURBO DNase inactivator for 2min at room temperature and the  
444 extracted RNA was kept at -20°C.

445

#### 446 **qRT-PCR.**

447 We performed reverse transcription using the First strand cDNA synthesis kit for RT-PCR  
448 (AMV) (Sigma-Aldrich) and the protocol described by the supplier. Briefly, 500µg RNA  
449 previously boiled 15min at 65°C were mixed with 2µL 10X reaction buffer, 4µL MgCl<sub>2</sub> 25mM,  
450 2µL dNTP mix at 10mM each, 1µL 3' primer 20µM, 1µL RNase inhibitor 50U/µL, 0.8 AMV  
451 reverse transcriptase and water. The mix was incubated at 42°C for 1h30 and the enzyme was  
452 inactivated by heating to 99°C for 5min. qPCR was performed using SYBR green PCR master  
453 mix (Life technologies). cDNA was mixed with SYBR green master mix as described by  
454 supplier and with corresponding primers in technical duplicates in 384-well plates. qPCR  
455 reaction was performed using QuantStudio 6 Flex Real-Time PCR System (ThermoFischer  
456 Scientific) and the “ $\Delta\Delta C_t$  method” program. We followed 16s rRNA and RpoB as  
457 housekeeping gene for normalization.

458

#### 459 **Staining of glycosylated proteins.**

460 Overnight cultures were adjusted to 1mL OD<sub>600</sub>=1, spun-down and resuspended in 100µL 1X  
461 Laemmli- $\beta$ -mercaptoethanol lysis buffer (BioRad) and boiled 5min at 95°C. 10µL were run on  
462 Mini-PROTEAN TGX Stain-Free TM precast Gels (BioRad) in 1X TGX buffer for 40min at  
463 170V. The gel was then stained using Pro-Q Emerald 300 staining for glycoproteins kit  
464 (Invitrogen) following the procedure described by the supplier.

465

#### 466 **Co-colonization of axenic mice.**

467 Animal experiments were done at “Animalerie Axénique de MICALIS (ANAXEM)” platform  
468 (Microbiologie de l’Alimentation au Service de la Santé (MICALIS), Jouy-en-Josas, France)  
469 according to an official authorization n°3441-2016010614307552 delivered by the French  
470 ministry of Education nationale, enseignement supérieur et recherche. The protocol was  
471 approved by a local ethic committee on animal experimentation (committee n°45). All animals  
472 were housed in flexible-film isolators (Getinge-La Calhène, Vendôme, France) with controlled  
473 environment conditions (light/dark 12 h/12 h, temperature between 20 and 22°C, humidity  
474 between 45 to 55%). Mice were provided with sterile tap water and a gamma-irradiated standard  
475 diet (R03-40, S.A.F.E., Augy, France), *ad libitum*. Their bedding was composed of wood  
476 shavings and they were also given cellulose sheets as enrichment.

477 For each combination performed in separate isolators, groups of 5 male C3H/HeN germ free  
478 mice (6-11 weeks-old) were gavaged with 200 $\mu$ L bacterial suspensions containing 100 cells of  
479 each of the two strains we co-inoculated. One of the strains was conjugated with pNBU2-bla-  
480 erm plasmid, and the other with pNBU2-bla-tet plasmid so that they contained a different  
481 antibiotic resistance marker for later distinction. One of the combinations (WT (ermR) vs  
482  $\Delta$ CPS4 (tetR)) was performed twice (10 mice total). We plated the mix used for gavage onto  
483 BHIS agar plates with erythromycin or with tetracycline to check the initial ratio. When it was  
484 not 1:1, we corrected the measured abundance according to the ratio we had effectively used.  
485 At 24, 48 and 72 hours after inoculation, feces were collected, split in two tubes and weighed.  
486 One of the tubes was homogenized in 1 ml of BHIS, and serial dilutions were plated onto BHIS  
487 agar plates with erythromycin or with tetracycline. The abundance of each strain in the feces  
488 was measured by numbering the colony forming units growing on each type of plate using  
489 automated plater (easySpiral, Interscience, France) and counter (Scan500, Interscience,  
490 France). The other tube was dried in a speed vac concentrator (Savant, U.S.A.) and weighted.  
491 This allowed us to calculate the percentage of humidity of the feces we were using for each  
492 mouse and each condition and to infer the dry weight of feces used for CFU numbering. We  
493 divided the number of bacteria obtained by CFU counting by the dry weight of feces they were  
494 collected from.

495

#### 496 **Growth curve.**

497 Overnight cultures were diluted to 0.05 OD<sub>600</sub> in 200 $\mu$ L BHIS that had previously been  
498 incubated in anaerobic condition overnight to remove dissolved oxygen, in Greiner flat-bottom  
499 96-well plates. A plastic adhesive film (adhesive sealing sheet, Thermo Scientific, AB0558)  
500 was added on top of the plate inside the anaerobic station, and the plates were then incubated  
501 in a TECAN Infinite M200 Pro spectrophotometer for 24 hours at 37°C. OD<sub>600</sub> was measured  
502 every 30 minutes, after 900 seconds orbital shaking of 2 mm amplitude.

503

#### 504 **Statistical analyses.**

505 Statistical analyses were performed using either R and Rstudio software or GraphPad Prism 8  
506 for Mac OS (GraphPad software, Inc.). We used only non-parametric test. For *in vivo*  
507 experiments, 5-10 mice were used in 1 or 2 independent experiments. For all other experiments,  
508 at least 6 biological replicates in at least 2 independent experiment were used. A cut-off of p-  
509 value of 5 % was used for all tests. \* p<0.05; \*\* p<0.05; \*\*\* p<0.005.

510



511 **COMPETING FINANCIAL INTERESTS**

512 The authors declare no competing financial interests.

513

514 **ACKNOWLEDGEMENTS.**

515 We are grateful to Andy Goodman and Justin Sonnenburg for providing the genetic tools used  
516 in this study and to Eric Martens for generously providing the *B. thetaiotaomicron* capsule  
517 mutants and mono-expressing strains. We are also very thankful for Laurie Comstock  
518 comments on this manuscript. This work was supported by an Institut Pasteur grant and by the  
519 French government's Investissement d'Avenir Program, Laboratoire d'Excellence "Integrative  
520 Biology of Emerging Infectious Diseases" (grant n°ANR-10-LABX-62-IBEID) and the  
521 *Fondation pour la Recherche Médicale* (grant no. DEQ20180339185). N. Béchon was  
522 supported by a MENESR (Ministère Français de l'Education Nationale, de l'Enseignement  
523 Supérieur et de la Recherche) fellowship. J. Mihajlovic was supported by the Pasteur Paris  
524 University International Doctoral Program and the *Fondation pour la Recherche Médicale*  
525 (grant no. FDT20160435523).

526

527

528 **REFERENCES**

- 529 1. **Eckburg PB, Bik EM, Bernstein CN, Purdom E, Dethlefsen L, Sargent M, Gill SR,**  
530 **Nelson KE, Relman DA.** 2005. Diversity of the human intestinal microbial flora. *Science* (New  
531 York, N.Y.) **308**:1635-1638.10.1126/science.1110591: 10.1126/science.1110591
- 532 2. **Hooper LV, Midtvedt T, Gordon JI.** 2002. How host-microbial interactions shape the  
533 nutrient environment of the mammalian intestine. *Annual review of nutrition* **22**:283-  
534 307.10.1146/annurev.nutr.22.011602.092259: 10.1146/annurev.nutr.22.011602.092259
- 535 3. **Comstock LE, Coyne MJ.** 2003. *Bacteroides thetaiotaomicron*: a dynamic, niche-  
536 adapted human symbiont. *BioEssays : news and reviews in molecular, cellular and*  
537 *developmental biology* **25**:926-929.10.1002/bies.10350: 10.1002/bies.10350
- 538 4. **Wexler AG, Goodman AL.** 2017. An insider's perspective: *Bacteroides* as a window  
539 into the microbiome. *Nature microbiology* **2**:17026.10.1038/nmicrobiol.2017.26:  
540 10.1038/nmicrobiol.2017.26
- 541 5. **Porter NT, Luis AS, Martens EC.** 2018. *Bacteroides thetaiotaomicron*. *Trends in*  
542 *microbiology* **26**:966-967.10.1016/j.tim.2018.08.005: 10.1016/j.tim.2018.08.005
- 543 6. **Hooper LV, Stappenbeck TS, Hong CV, Gordon JI.** 2003. Angiogenins: a new class  
544 of microbicidal proteins involved in innate immunity. *Nat. Immunol.* **4**:269-273.10.1038/ni888:  
545 10.1038/ni888
- 546 7. **Kelly D, Campbell JI, King TP, Grant G, Jansson EA, Coutts AG, Pettersson S,**  
547 **Conway S.** 2004. Commensal anaerobic gut bacteria attenuate inflammation by regulating  
548 nuclear-cytoplasmic shuttling of PPAR-gamma and RelA. *Nat Immunol* **5**:104-  
549 112.10.1038/ni1018: 10.1038/ni1018
- 550 8. **Hooper LV, Wong MH, Thelin A, Hansson L, Falk PG, Gordon JI.** 2001. Molecular  
551 analysis of commensal host-microbial relationships in the intestine. *Science* (New York, N.Y.)  
552 **291**:881-884.10.1126/science.291.5505.881: 10.1126/science.291.5505.881

- 553 9. **Zocco MA, Ainora ME, Gasbarrini G, Gasbarrini A.** 2007. Bacteroides  
554 thetaiotaomicron in the gut: molecular aspects of their interaction. *Dig Liver Dis* **39**:707-  
555 712.10.1016/j.dld.2007.04.003: 10.1016/j.dld.2007.04.003
- 556 10. **Frank DN, St Amand AL, Feldman RA, Boedeker EC, Harpaz N, Pace NR.** 2007.  
557 Molecular-phylogenetic characterization of microbial community imbalances in human  
558 inflammatory bowel diseases. *Proceedings of the National Academy of Sciences of the United*  
559 *States of America* **104**:13780-13785.10.1073/pnas.0706625104: 10.1073/pnas.0706625104
- 560 11. **de Vos WM.** 2015. Microbial biofilms and the human intestinal microbiome. *NPJ*  
561 *biofilms and microbiomes* **1**:15005.10.1038/npjbiofilms.2015.5: 10.1038/npjbiofilms.2015.5
- 562 12. **Macfarlane S, Bahrami B, Macfarlane GT.** 2011. Mucosal biofilm communities in  
563 the human intestinal tract. *Advances in applied microbiology* **75**:111-143.10.1016/b978-0-12-  
564 387046-9.00005-0: 10.1016/b978-0-12-387046-9.00005-0
- 565 13. **Mihajlovic J, Bechon N, Ivanova C, Chain F, Almeida A, Langella P, Beloin C,**  
566 **Ghigo JM.** 2019. A Putative Type V Pilus Contributes to Bacteroides thetaiotaomicron Biofilm  
567 Formation Capacity. *Journal of bacteriology* **201**.10.1128/jb.00650-18: 10.1128/jb.00650-18
- 568 14. **Reis ACM, Silva JO, Laranjeira BJ, Pinheiro AQ, Carvalho CBM.** 2014. Virulence  
569 factors and biofilm production by isolates of Bacteroides fragilis recovered from dog intestinal  
570 tracts. *Braz J Microbiol* **45**:647-650
- 571 15. **TerAvest MA, He Z, Rosenbaum MA, Martens EC, Cotta MA, Gordon JI,**  
572 **Angenent LT.** 2014. Regulated expression of polysaccharide utilization and capsular  
573 biosynthesis loci in biofilm and planktonic Bacteroides thetaiotaomicron during growth in  
574 chemostats. *Biotechnol. Bioeng.* **111**:165-173.10.1002/bit.24994: 10.1002/bit.24994
- 575 16. **Xu J, Bjursell MK, Himrod J, Deng S, Carmichael LK, Chiang HC, Hooper LV,**  
576 **Gordon JI.** 2003. A genomic view of the human-Bacteroides thetaiotaomicron symbiosis.

- 577 17. **Coyne MJ, Comstock LE.** 2008. Niche-specific features of the intestinal bacteroidales.  
578 *Journal of bacteriology* **190**:736-742.10.1128/jb.01559-07: 10.1128/jb.01559-07
- 579 18. **Chatzidaki-Livanis M, Coyne MJ, Comstock LE.** 2009. A family of transcriptional  
580 antitermination factors necessary for synthesis of the capsular polysaccharides of *Bacteroides*  
581 *fragilis*. *Journal of bacteriology* **191**:7288-7295.10.1128/jb.00500-09: 10.1128/jb.00500-09
- 582 19. **Chatzidaki-Livanis M, Weinacht KG, Comstock LE.** 2010. Trans locus inhibitors  
583 limit concomitant polysaccharide synthesis in the human gut symbiont *Bacteroides fragilis*.  
584 *Proceedings of the National Academy of Sciences of the United States of America* **107**:11976-  
585 11980.10.1073/pnas.1005039107: 10.1073/pnas.1005039107
- 586 20. **Porter NT, Canales P, Peterson DA, Martens EC.** 2017. A Subset of Polysaccharide  
587 Capsules in the Human Symbiont *Bacteroides thetaiotaomicron* Promote Increased  
588 Competitive Fitness in the Mouse Gut. *Cell host & microbe* **22**:494-  
589 506.e498.10.1016/j.chom.2017.08.020: 10.1016/j.chom.2017.08.020
- 590 21. **Fletcher CM, Coyne MJ, Villa OF, Chatzidaki-Livanis M, Comstock LE.** 2009. A  
591 general O-glycosylation system important to the physiology of a major human intestinal  
592 symbiont. *Cell* **137**:321-331.10.1016/j.cell.2009.02.041: 10.1016/j.cell.2009.02.041
- 593 22. **Coyne MJ, Fletcher CM, Chatzidaki-Livanis M, Posch G, Schaffer C, Comstock**  
594 **LE.** 2013. Phylum-wide general protein O-glycosylation system of the Bacteroidetes.  
595 *Molecular microbiology* **88**:772-783.10.1111/mmi.12220: 10.1111/mmi.12220
- 596 23. **Goodman AL, McNulty NP, Zhao Y, Leip D, Mitra RD, Lozupone CA, Knight R,**  
597 **Gordon JI.** 2009. Identifying genetic determinants needed to establish a human gut symbiont  
598 in its habitat. *Cell host & microbe* **6**:279-289.10.1016/j.chom.2009.08.003:  
599 10.1016/j.chom.2009.08.003

- 600 24. **Peterson DA, McNulty NP, Guruge JL, Gordon JI.** 2007. IgA response to symbiotic  
601 bacteria as a mediator of gut homeostasis. *Cell host & microbe* **2**:328-  
602 339.10.1016/j.chom.2007.09.013: 10.1016/j.chom.2007.09.013
- 603 25. **Hsieh S, Porter NT, Donermeyer DL, Horvath S, Strout G, Saunders BT, Zhang**  
604 **N, Zinselmeyer B, Martens EC, Stappenbeck TS, Allen PM.** 2020. Polysaccharide Capsules  
605 Equip the Human Symbiont *Bacteroides thetaiotaomicron* to Modulate Immune Responses to  
606 a Dominant Antigen in the Intestine. *Journal of immunology (Baltimore, Md. : 1950)* **204**:1035-  
607 1046.10.4049/jimmunol.1901206: 10.4049/jimmunol.1901206
- 608 26. **Porter NT, Hryckowian AJ, Merrill BD, Gardner JO, Singh S, Sonnenburg JL,**  
609 **Martens EC.** 2019. Multiple phase-variable mechanisms, including capsular polysaccharides,  
610 modify bacteriophage susceptibility in *Bacteroides thetaiotaomicron*. *bioRxiv* 521070; doi:  
611 <https://doi.org/10.1101/521070>
- 612 27. **Gillaspy AF, Lee CY, Sau S, Cheung AL, Smeltzer MS.** 1998. Factors affecting the  
613 collagen binding capacity of *Staphylococcus aureus*. *Infection and immunity* **66**:3170-3178
- 614 28. **Joseph LA, Wright AC.** 2004. Expression of *Vibrio vulnificus* capsular polysaccharide  
615 inhibits biofilm formation. *Journal of bacteriology* **186**:889-893.10.1128/jb.186.3.889-  
616 893.2004: 10.1128/jb.186.3.889-893.2004
- 617 29. **Yi K, Rasmussen AW, Gudlavalleti SK, Stephens DS, Stojiljkovic I.** 2004. Biofilm  
618 formation by *Neisseria meningitidis*. *Infection and immunity* **72**:6132-  
619 6138.10.1128/iai.72.10.6132-6138.2004: 10.1128/iai.72.10.6132-6138.2004
- 620 30. **Schembri MA, Dalsgaard D, Klemm P.** 2004. Capsule shields the function of short  
621 bacterial adhesins. *Journal of bacteriology* **186**:1249-1257.10.1128/jb.186.5.1249-1257.2004:  
622 10.1128/jb.186.5.1249-1257.2004
- 623 31. **Qin L, Kida Y, Imamura Y, Kuwano K, Watanabe H.** 2013. Impaired capsular  
624 polysaccharide is relevant to enhanced biofilm formation and lower virulence in *Streptococcus*

- 625 pneumoniae. *Journal of infection and chemotherapy : official journal of the Japan Society of*  
626 *Chemotherapy* **19**:261-271.10.1007/s10156-012-0495-3: 10.1007/s10156-012-0495-3
- 627 32. **Schembri MA, Hjerrild L, Gjermansen M, Klemm P.** 2003. Differential expression  
628 of the *Escherichia coli* autoaggregation factor antigen 43. *Journal of bacteriology* **185**:2236-  
629 2242.10.1128/jb.185.7.2236-2242.2003: 10.1128/jb.185.7.2236-2242.2003
- 630 33. **Shifrin Y, Peleg A, Ilan O, Nadler C, Kobi S, Baruch K, Yerushalmi G,**  
631 **Berdichevsky T, Altuvia S, Elgrably-Weiss M, Abe C, Knutton S, Sasakawa C, Ritchie**  
632 **JM, Waldor MK, Rosenshine I.** 2008. Transient shielding of intimin and the type III secretion  
633 system of enterohemorrhagic and enteropathogenic *Escherichia coli* by a group 4 capsule.  
634 *Journal of bacteriology* **190**:5063-5074.10.1128/jb.00440-08: 10.1128/jb.00440-08
- 635 34. **Liu CH, Lee SM, Vanlare JM, Kasper DL, Mazmanian SK.** 2008. Regulation of  
636 surface architecture by symbiotic bacteria mediates host colonization. *Proceedings of the*  
637 *National Academy of Sciences of the United States of America* **105**:3951-  
638 3956.10.1073/pnas.0709266105: 10.1073/pnas.0709266105
- 639 35. **Porter NT, Martens EC.** 2017. The Critical Roles of Polysaccharides in Gut Microbial  
640 Ecology and Physiology. *Annual review of microbiology* **71**:349-369.10.1146/annurev-micro-  
641 102215-095316: 10.1146/annurev-micro-102215-095316
- 642 36. **Krinos CM, Coyne MJ, Weinacht KG, Tzianabos AO, Kasper DL, Comstock LE.**  
643 2001. Extensive surface diversity of a commensal microorganism by multiple DNA inversions.  
644 *Nature* **414**:555-558.10.1038/35107092: 10.1038/35107092
- 645 37. **Sonnenburg JL, Xu J, Leip DD, Chen CH, Westover BP, Weatherford J, Buhler**  
646 **JD, Gordon JI.** 2005. Glycan foraging in vivo by an intestine-adapted bacterial symbiont.  
647 *Science (New York, N.Y.)* **307**:1955-1959.10.1126/science.1109051:  
648 10.1126/science.1109051

- 649 38. **Bjursell MK, Martens EC, Gordon JI.** 2006. Functional genomic and metabolic  
650 studies of the adaptations of a prominent adult human gut symbiont, *Bacteroides*  
651 *thetaiotaomicron*, to the suckling period. *The Journal of biological chemistry* **281**:36269-  
652 36279.10.1074/jbc.M606509200: 10.1074/jbc.M606509200
- 653 39. **Liu H, Price MN, Carlson HK, Chen Y, Ray J, Shiver AL, Petzold CJ, Huang KC,**  
654 **Arkin AP, Deutschbauer AM.** 2019. Large-scale chemical-genetics of the human gut  
655 bacterium *Bacteroides thetaiotaomicron*. bioRxiv 573055; doi: <https://doi.org/10.1101/573055>
- 656 40. **Xu Q, Shoji M, Shibata S, Naito M, Sato K, Elsliger M-A, Grant JC, Axelrod HL,**  
657 **Chiu H-J, Farr CL, Jaroszewski L, Knuth MW, Deacon AM, Godzik A, Lesley SA, Curtis**  
658 **MA, Nakayama K, Wilson IA.** 2016. A Distinct Type of Pilus from the Human Microbiome.  
659 *Cell* **165**:690-703.10.1016/j.cell.2016.03.016: 10.1016/j.cell.2016.03.016
- 660 41. **Zheng C, Wu J, Xie H.** 2011. Differential expression and adherence of *Porphyromonas*  
661 *gingivalis* FimA genotypes. *Mol Oral Microbiol* **26**:388-395.10.1111/j.2041-  
662 1014.2011.00626.x: 10.1111/j.2041-1014.2011.00626.x
- 663 42. **Hospenthal MK, Costa TRD, Waksman G.** 2017. A comprehensive guide to pilus  
664 biogenesis in Gram-negative bacteria. *Nature reviews. Microbiology* **15**:365-  
665 379.10.1038/nrmicro.2017.40: 10.1038/nrmicro.2017.40
- 666 43. **Zmora N, Zilberman-Schapira G, Suez J, Mor U, Dori-Bachash M, Bashiardes S,**  
667 **Kotler E, Zur M, Regev-Lehavi D, Brik RB, Federici S, Cohen Y, Linevsky R, Rothschild**  
668 **D, Moor AE, Ben-Moshe S, Harmelin A, Itzkovitz S, Maharshak N, Shibolet O, Shapiro**  
669 **H, Pevsner-Fischer M, Sharon I, Halpern Z, Segal E, Elinav E.** 2018. Personalized Gut  
670 Mucosal Colonization Resistance to Empiric Probiotics Is Associated with Unique Host and  
671 Microbiome Features. *Cell* **174**:1388-1405.e1321.10.1016/j.cell.2018.08.041:  
672 10.1016/j.cell.2018.08.041

- 673 44. **Bacic MK, Smith CJ.** 2008. Laboratory maintenance and cultivation of bacteroides  
674 species. Curr Protoc Microbiol **Chapter 13**:Unit-  
675 13C.11.10.1002/9780471729259.mc13c01s9: 10.1002/9780471729259.mc13c01s9
- 676 45. **Koropatkin NM, Martens EC, Gordon JI, Smith TJ.** 2008. Starch catabolism by a  
677 prominent human gut symbiont is directed by the recognition of amylose helices. Structure  
678 **16**:1105-1115.10.1016/j.str.2008.03.017: 10.1016/j.str.2008.03.017
- 679 46. **Wang J, Shoemaker NB, Wang G-R, Salyers AA.** 2000. Characterization of a  
680 Bacteroides Mobilizable Transposon, NBU2, Which Carries a Functional Lincomycin  
681 Resistance Gene. Journal of bacteriology **182**:3559-3571
- 682  
683  
684



685 **FIGURES AND FIGURE LEGENDS**

686

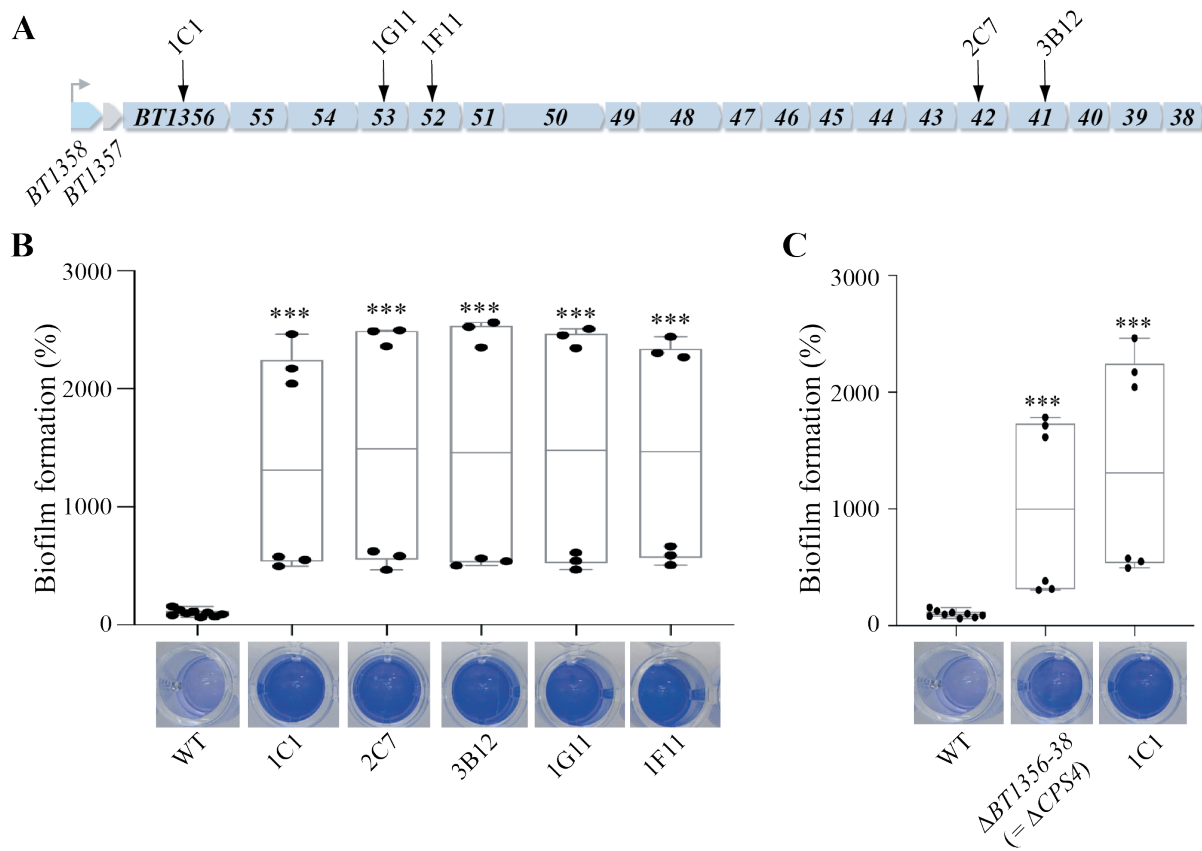

687

688 **Figure 1. Capsule 4 inhibits biofilm formation in *B. thetaiotaomicron* VPI5482.** **A.** Organization of *B.*  
 689 *thetaitaomicron* capsular operon 4 (*CPS4*). The first two genes (*BT1358* and *BT1357*) code for regulators of  
 690 capsular biosynthesis. *BT1356-1338* code for the enzymes involved in Cps4 capsular polysaccharide biosynthesis.  
 691 Arrows indicate 5 individual transposon insertions within the *CPS4* operon. **B.** 96-well plate biofilm assay after  
 692 48h growth in BHIS. Mean of WT is adjusted to 100 %. Min-max boxplot of 6 biological replicates for each strain,  
 693 each replicate is the mean of two technical replicates. \*\*\* p-value <0.0005, Mann-Whitney test, comparing the  
 694 indicated mutant to WT. **C.** 96-well plate biofilm assay after 48h growth in BHIS. Mean of WT is adjusted to  
 695 100 %. Min-max boxplot of 6-9 biological replicates for each strain, each replicate is the mean of two technical  
 696 replicates. \*\*\* p-value <0.0005, Mann-Whitney test, comparing the indicated mutant to WT. The images shown  
 697 under each boxplot correspond to representative CV-stained microtiter wells after resuspension of the biofilm.

698

699

700

701

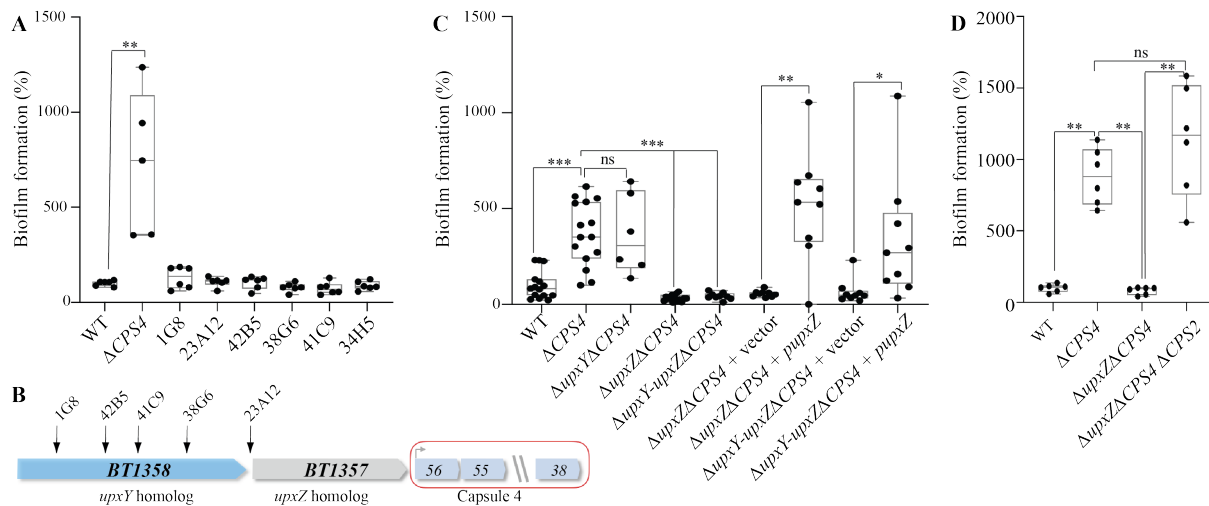

702  
 703 **Figure 2. Capsule cross-regulation modulates biofilm formation in *B. thetaiotaomicron*.** **A.** 96-well plate  
 704 crystal violet biofilm assay after 48h growth in BHIS. **B.** Organization of *B. thetaiotaomicron* capsular operon 4  
 705 (CPS4) with identified transposon insertion points in the first two genes of the operon (*BT1358* and *BT1357*),  
 706 coding regulators of capsular biosynthesis. **C.** 96-well plate crystal violet biofilm assay after 48h growth in BHIS.  
 707 Mean of WT is adjusted to 100 %. **D.** 96-well plate crystal violet biofilm assay after 48h growth in BHIS. **A,C,D:**  
 708 Mean of WT is adjusted to 100 %. Min-max boxplot of 6-9 biological replicates for each strain, each replicate is  
 709 the mean of two technical replicates. \*\* p-value <0.005, Mann-Whitney test. **C.** and **D.** *upxY* strands for *upxY<sup>BT1358</sup>*  
 710 and *upxZ* stands for *upxZ<sup>BT1357</sup>*.

711  
 712

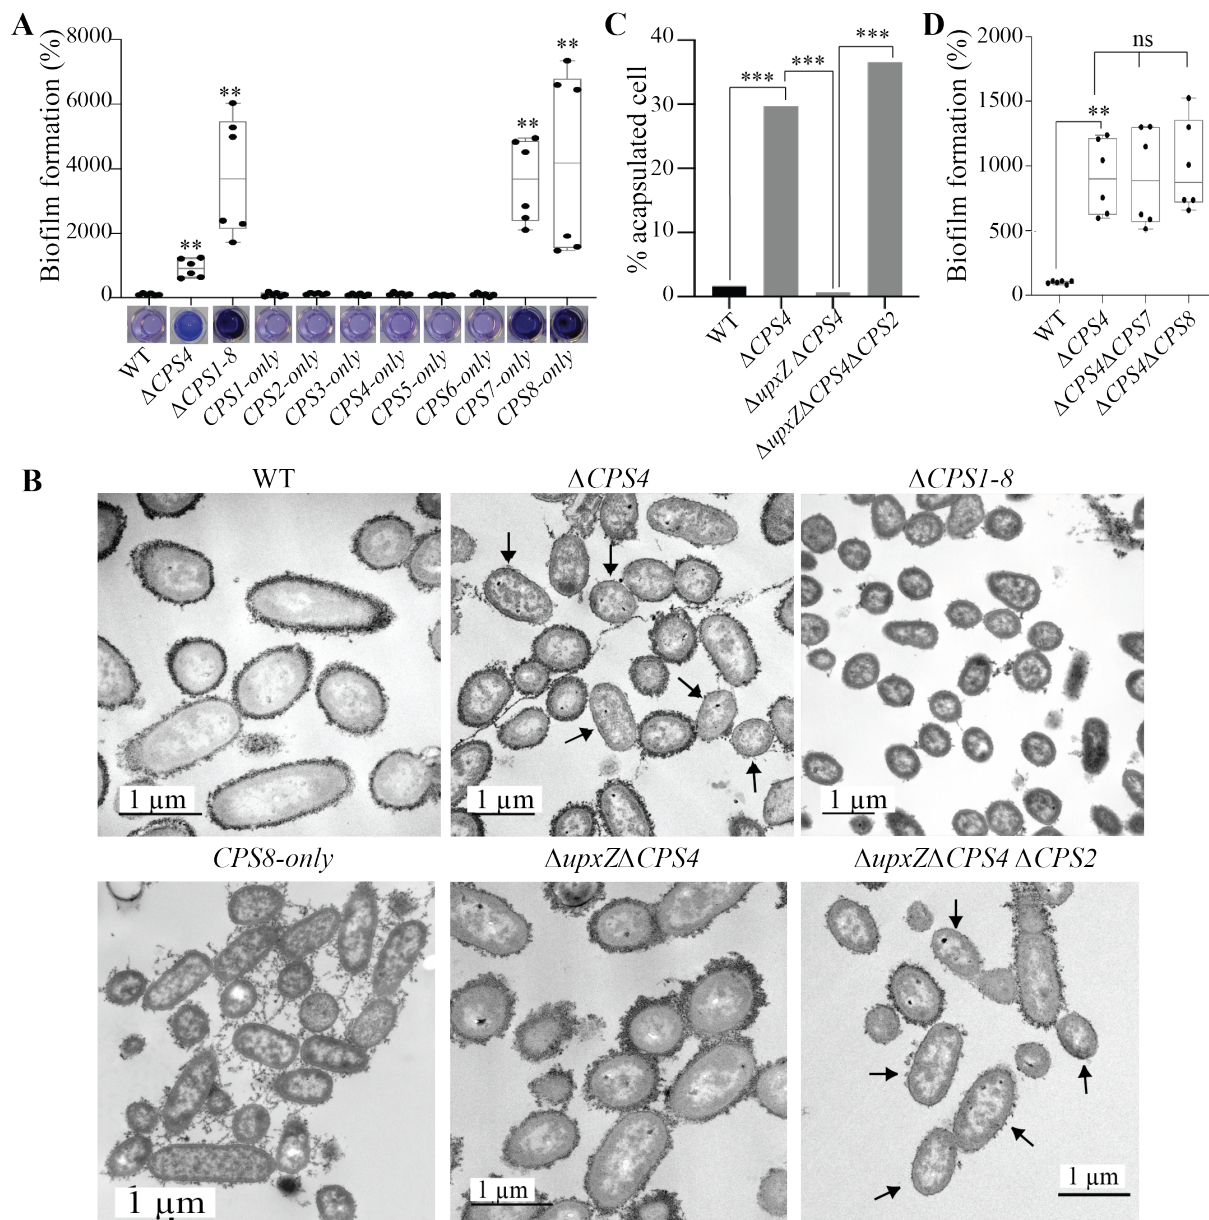

713

714

715 **Figure 3. Capsule expression in *B. thetaiotaomicron* is heterogenous and has consequences on biofilm**

716 **formation. A. and D.** 96-well plate biofilm assay after 48h growth in BHIS. Mean of WT is adjusted to 100 %.

717 Min-max boxplot of 6 biological replicates for each strain, each replicate is the mean of two technical replicates.

718 \*\* p-value <0.005, Mann-Whitney test, comparing the indicated mutant to WT. The pictures shown under boxplot

719 **A.** correspond to representative CV-stained microtiter wells after resuspension of the biofilm. **B.** Transmission

720 electron microscopy (TEM) images of overnight cultures fixed with ferritin. Arrows indicate some example of

721 acapsulated cells. **C.** Percentage of acapsulated cells of indicated strain counted on TEM pictures. For each strain

722 at least 100 cells were counted. \*\*\* p-value <0.0005, prop.test (R). **B.** and **C.** *upxY* strands for *upxY*<sup>BT1358</sup> and *upxZ*

723 strands for *upxZ*<sup>BT1357</sup>.

724

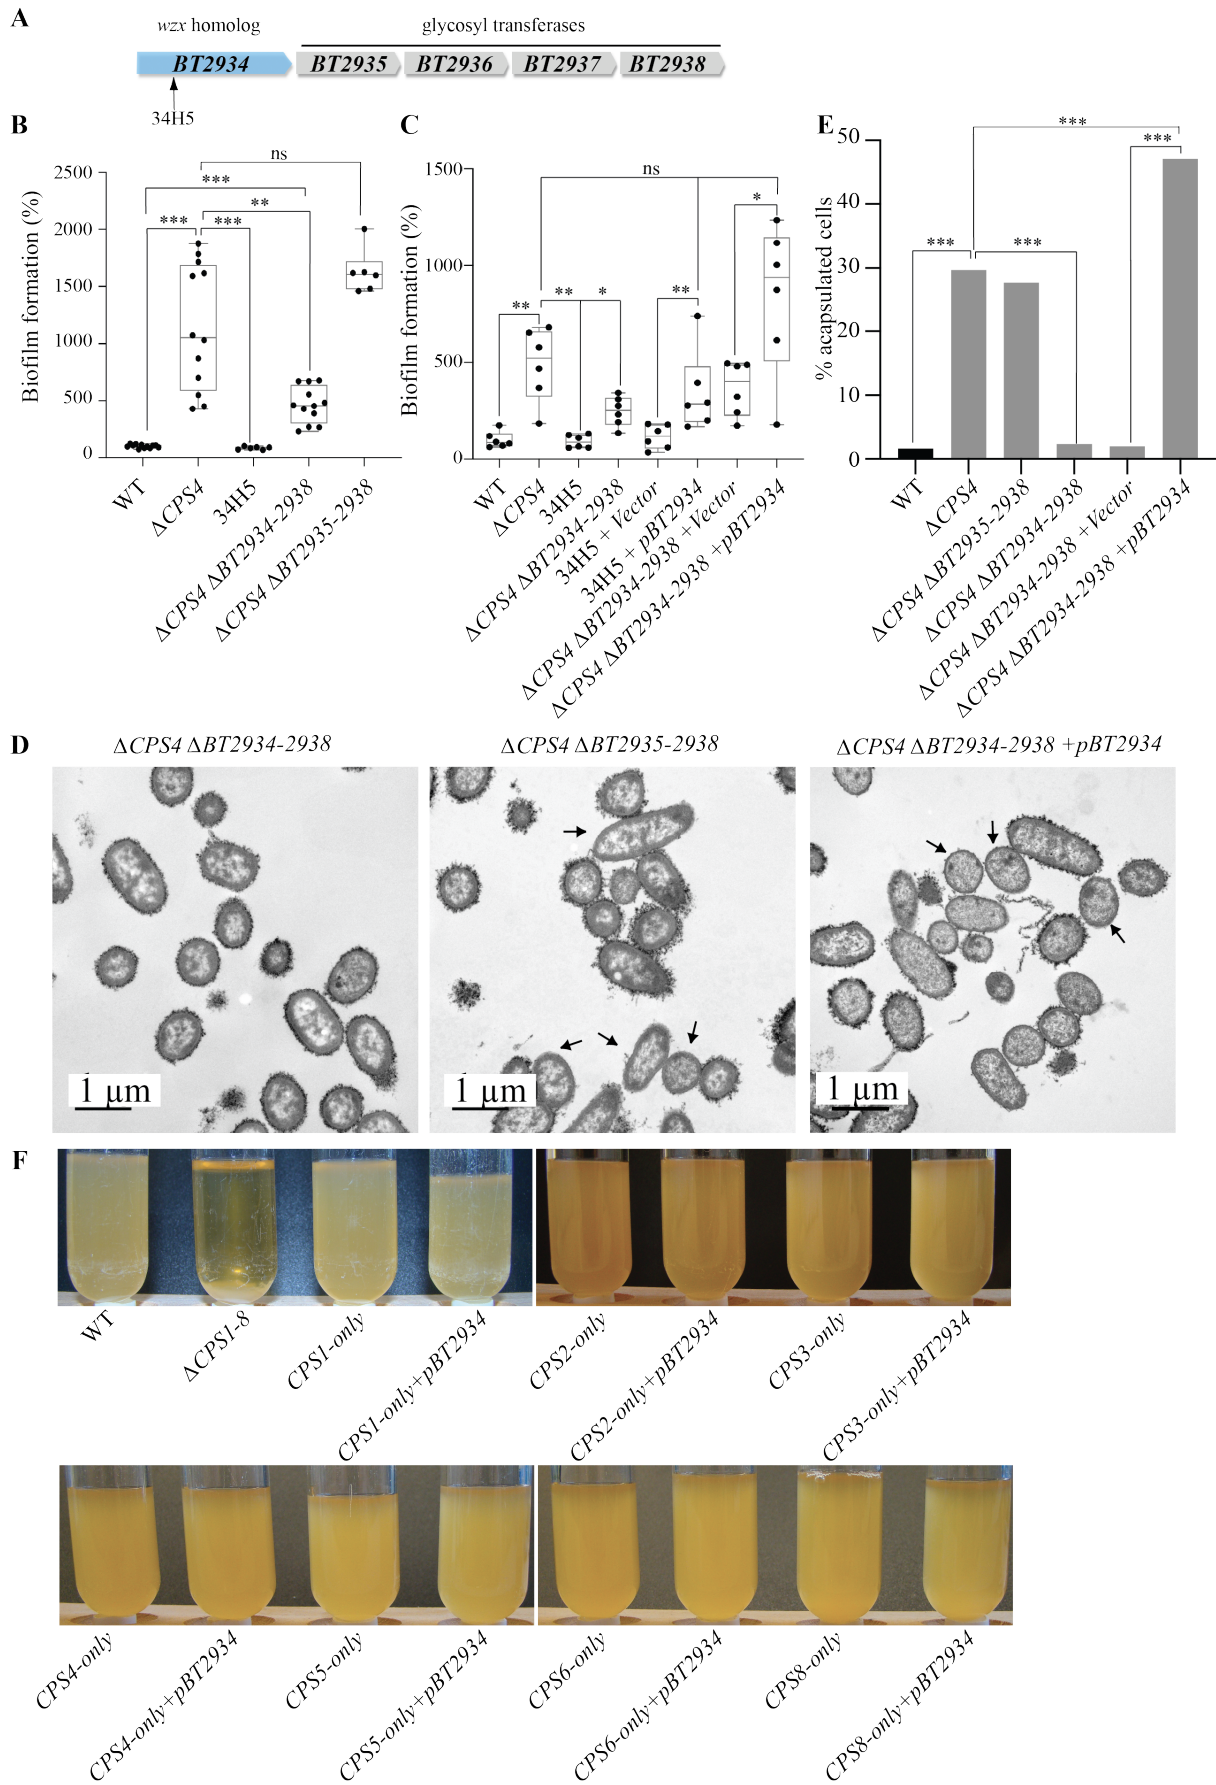

726 Figure 4. **BT2934 is a novel capsule inhibitor**. **A.** Organization of *B. thetaiotaomicron* protein glycosylation  
 727 *BT2934* locus with identified transposon insertion point. **B.** and **C.** 96-well plate crystal violet biofilm assay after  
 728 48h growth in BHIS. Mean of WT is adjusted to 100 %. Min-max boxplot of 6-12 biological replicates for each  
 729 strain, each replicate is the mean of two technical replicates. \*, p-value<0.05, \*\* p-value<0.005, \*\*\* p-value  
 730 <0.0005, Mann-Whitney test. **D.** TEM images of  $\Delta CPS4\Delta BT2934-2938$ ,  $\Delta CPS4\Delta BT2935-2938$  and  
 731  $\Delta CPS4\Delta BT2934-2938+pBT2934$  overnight cultures fixed with ferritin. Arrows indicate some acapsulated cells as  
 732 an example. **E.** Percentage of acapsulated cells in overnight cultures counted on TEM pictures. For each strain at  
 733 least 100 cells were counted. \*\*\* p-value<0.0005, prop.test (R). **F.** Overnight cultures of indicated strains in BHIS.  
 734 Only  $\Delta CPS1-8$  showed aggregation.  
 735

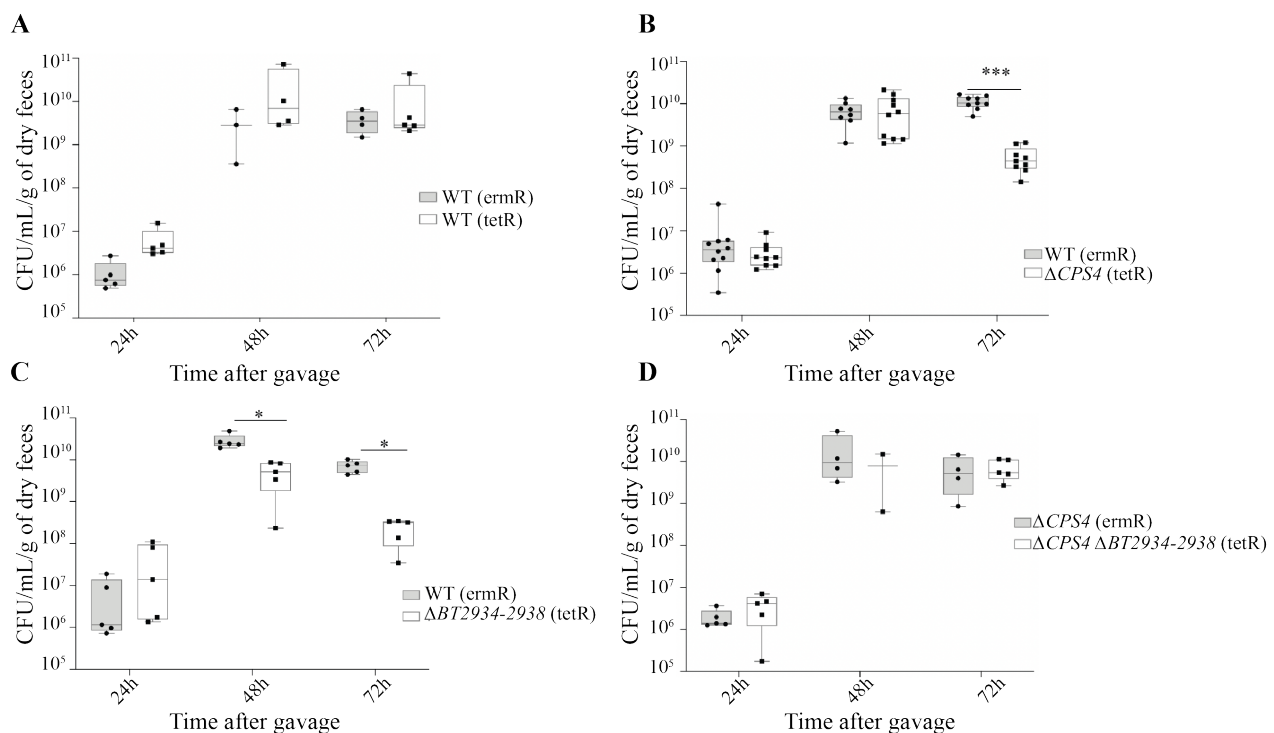

736  
 737 Figure 5. **BT2934 and CPS4 contribute to in vivo colonization in axenic mice**. Min-Max boxplot of CFU/mL/dry  
 738 weight of feces, numbered from feces from 5-10 axenic mice after co-colonization with indicated strains. \*  
 739 pvalue<0.05, \*\* p-value<0.005, \*\*\* p-value<0.0005, Mann-Whitney test. **A.** WT (ermR) vs WT (tetR). **B.** WT  
 740 (ermR) vs  $\Delta CPS4$  (tetR). **C.** (ermR) vs  $\Delta BT2934-2938$  (tetR). **D.**  $\Delta CPS4$  (ermR) vs  $\Delta CPS4\Delta BT2934-2938$  (tetR).  
 741
